# Supplementary material for: Primary ChAdOx1 vaccination does not reactivate pre-existing, cross-reactive immunity
Source: Frontiers journal article supplement (doi:10.3389/fimmu.2023.1056525), 2023-01-31
Supplement: Data_Sheet_4.PDF [file Data_Sheet_4.PDF]

**A** Repertoire overlap

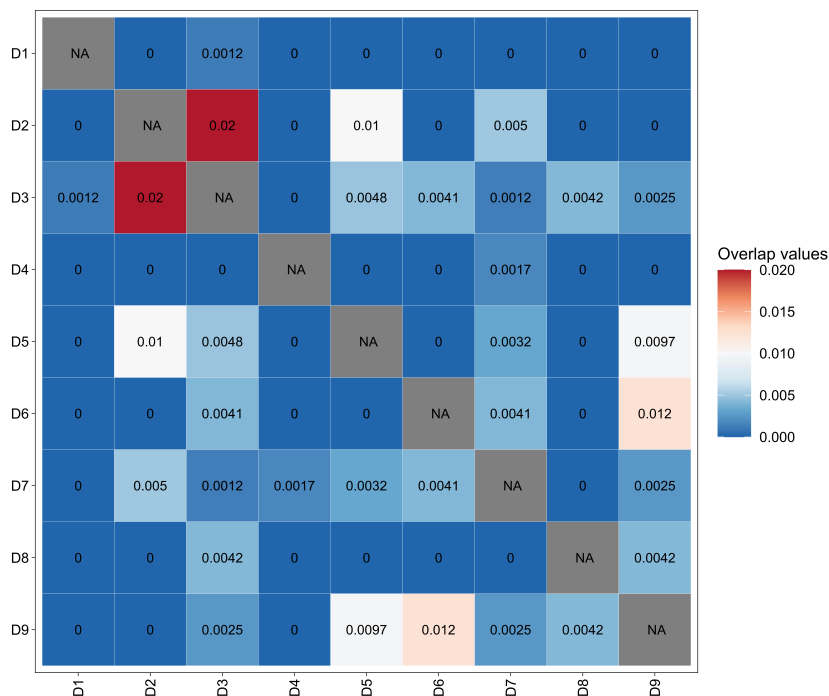

**B** Relative gene expression

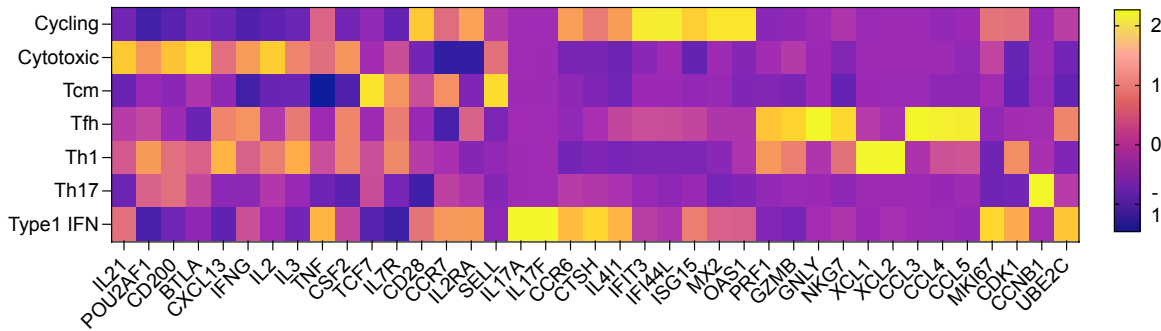

**Supplementary Figure 4: Homologous vaccination, heterologous vaccination and vaccination infection result in comparable S-I-specific CD4<sup>+</sup> TCR repertoire and phenotype. (A)** A normalized measure of TCRab overlap, defined as the size of the intersection divided by the smaller size of the two sets. D1-D3: AZ-BNT-BNT; D4-D6: BNT-BNT-BNT; D7-D9: BNT-BNT-INF **(B)** Relative gene expression of selected marker genes in S-I-specific CD4<sup>+</sup> T cells underlying the allocated clusters of Fig.5 F.
