# Supplementary material for: Primary ChAdOx1 vaccination does not reactivate pre-existing, cross-reactive immunity
Source: Front Immunol. 2023 Jan 31;14:1056525. doi: 10.3389/fimmu.2023.1056525 (PMC9927399; doi:10.3389/fimmu.2023.1056525)
Supplement: Supplementary file 1 [file Table_1.xlsx]

## Sheet: Tab1
Table 1	Vaccination cohorts
Cohort	Number of donors	Age (Mean ± SD)	Gender (f/m)
AZ-BNT-BNT	17	28.76 ±10.16	2022-08-09
BNT-BNT-BNT	16	34.8 ± 9.42	2022-10-06
