# Supplementary material for: Primary ChAdOx1 vaccination does not reactivate pre-existing, cross-reactive immunity
Source: Front Immunol. 2023 Jan 31;14:1056525. doi: 10.3389/fimmu.2023.1056525 (PMC9927399; doi:10.3389/fimmu.2023.1056525)
Supplement: Supplementary file 2 [file Table_2.xlsx]

## Sheet: Tab1
Table S2	List of antibodies used for flow cytometry
Marker	Fluorochrome	Clone	Manufacturer	RRID	Titration
CD3	FITC	REA613	Miltenyi	AB_2725966	1:50
CD4	VioGreen	REA623	Miltenyi	AB_2726041	1:50
CD8	VioBlue	REA734	Miltenyi	AB_2659239	1:50
HLA-DR	PerCPVio700	REA805	Miltenyi	AB_2652172	1:50
CD38	APC	REA671	Miltenyi	AB_2726164	1:50
CD40L	PECy7	SA047C3	Biolegend	AB_2832545	1:100
4-1BB	PE	REA765	Miltenyi	AB_2654986	1:50
IFN-γ	A700	B27	Biolegend	AB_961351	1:100
TNF-α	BV605	MAb11	Biolegend	AB_11203719	1:100
